# Interactions between *ACYP2* genetic polymorphisms and environment factors with susceptibility to ischemic stroke in a Han Chinese Population

Qiong Cheng<sup>1,\*</sup>, Yong-Kun Li<sup>1,\*</sup>, Feng Lu<sup>2</sup>, Lianhua Yin<sup>2</sup>, Yin-Zhou Wang<sup>1</sup>, Wen Wei<sup>3</sup> and Qian Lin<sup>4</sup>

<sup>1</sup>Department of Neurology, Fujian Provincial Hospital, Provincial Clinical Department of Fujian Medical University, Fuzhou, 350001, Fujian Province, China

<sup>2</sup>The Second People's Hospital Affiliated to Fujian University of Traditional Chinese Medicine, Fuzhou, 350003, Fujian Province, China

<sup>3</sup>Department of Rehabilitation of GanZhou Municipal Hospital, GanZhou, 341000, Jiangxi Province, China

<sup>4</sup>Department of Neurology, Fuzhou Second Hospital, Fuzhou, 350007, Fujian Province, China

\*This author equally contributed to this work

**Correspondence to:** Yin-Zhou Wang, **email:** wphd@163.com

**Keywords:** *ischemic stroke, single nucleotide polymorphisms, interaction, smoking, alcohol drinking*

**Received:** April 05, 2017

**Accepted:** May 14, 2017

**Published:** June 09, 2017

**Copyright:** Cheng et al. This is an open-access article distributed under the terms of the Creative Commons Attribution License 3.0 (CC BY 3.0), which permits unrestricted use, distribution, and reproduction in any medium, provided the original author and source are credited.

## ABSTRACT

**Aims:** To investigate the association of several single nucleotide polymorphisms (SNPs) within *ACYP2* gene and additional gene- environment interaction with ischemic stroke (IS) risk in a Chinese population.

**Results:** IS risk was significantly higher in carriers with the G allele of rs11896604 than those with CC genotype (CG or GG versus CC), adjusted OR (95%CI) = 1.60 (1.18–2.20), and higher in carriers with the A allele of rs12615793 than those with GG genotype (GA or AA versus GG), adjusted OR (95%CI) = 1.66 (1.24–2.15). GMDR model shown a significant two-locus model ( $p = 0.0010$ ) involving rs11896604 and alcohol drinking, and a significant two-locus model ( $p = 0.0010$ ) involving rs12615793 and smoking. Current smokers with rs12615793- GA or AA genotype have the highest IS risk, compared to never- smokers with rs12615793-GG genotype, OR (95%CI) = 2.72 (1.64–3.86); current drinkers with rs11896604-CG or GG genotype have the highest IS risk, compared to never- drinkers with rs11896604-CC genotype, OR (95%CI) = 2.51 (1.70–3.40).

**Materials and Methods:** A total of 1202 participants (660 males, 542 females) were selected, including 600 IS patients and 602 control participants. The mean age of all participants was  $68.2 \pm 15.8$  years. Generalized multifactor dimensionality reduction (GMDR) was used to screen the best interaction combination. Logistic regression was performed to investigate the impact of 4 SNPs within *ACYP2* gene, additional gene-smoking or drinking interaction on IS risk.

**Conclusions:** We found that the G allele of rs11896604 and the A allele of rs12615793 within *ACYP2* gene, rs12615793- smoking interaction, and rs11896604- alcohol drinking interaction were all associated with increased IS risk.

## INTRODUCTION

Stroke is caused by cell death owing to abnormal blood supply in brain with high mortality and disability [1, 2]. In China, the stroke prevalence and death rate was

much higher than western countries [3, 4]. Among all subtypes of stroke, ischemic stroke (IS) have accounted for the majority of cases in China [5]. IS was a common type, accounts for 85% of stroke deaths and was effected by multiple factors, such as gene, hypertension, tobacco

smoking and diabetes [6]. Previous studies have reported that the shorter telomere length (TL) was associated with risk of several diseases, including IS [7, 8].

The *ACYP2* gene which located on chromosome 2p16.2, encodes a small cytosolic acylphosphatase enzyme that catalyzes the hydrolysis of carboxyl-phosphate bonds [9]. Genome wide association study [10] have demonstrated that genetic polymorphisms in *ACYP2* are associated with telomere length, which has led to studies of the association between *ACYP2* and various diseases, including ischemic stroke [7, 8]. A recent paper has indicated a significant association between *ACYP2* and *TSPYL6* single nucleotide polymorphisms (SNPs) associated with coronary heart disease (CHD) [11]. To date, just one study has reported the association between *ACYP2* gene SNPs and IS risk in Chinese population. In addition, IS susceptibility was influenced by both genetic and environment factors, such as smoking and drinking [12]. But till now, no study focused on the synergistic effect between *ACYP2* gene and smoking or drinking on IS risk. So the aim of this study was to investigate the impact of several SNPs within *ACYP2* gene, and their additional gene-smoking or gene- alcohol drinking interaction on IS risk in this Chinese population.

## RESULTS

A total of 1202 subjects (660 males, 542 females) were selected, including 600 IS cases and 602 controls. The mean age was  $68.2 \pm 15.8$  years for all studied participants. Table 1 shows the general characteristics for case and control group. There were no significant difference between cases and controls in mean age and distributions for males, hypertension and T2DM were not significantly different. The mean of BMI and the rates of smokers and alcohol drinkers were higher in cases than controls.

All *P*- values for the Hardy–Weinberg equilibrium test were more than 0.05. The frequencies for the G allele of rs11896604 and the A allele of rs12615793 were significantly higher in IS patients than controls (30.9% vs20.3%, 29.0% vs19.5%). IS risk was significantly higher in carriers with the G allele of rs11896604 than those with CC genotype (CG or GG versus CC), adjusted OR (95%CI) = 1.60 (1.18–2.20), and higher in carriers with the A allele of rs12615793 than those with GG genotype (GA or AA versus GG), adjusted OR (95%CI) = 1.66 (1.24–2.15). However, rs843711 and rs11125529 were not associated with IS risk after covariates adjustment. (Table 2)

GMDR model were used to screen the best interaction combinations for gene- smoking and gene- alcohol drinking interaction. Table 3 shown a significant interaction between rs11896604 and alcohol drinking ( $p = 0.0010$ ), the cross-validation consistency and the testing accuracy of this two-locus model were 10/ 10 and 60.72% respectively. We also found a significant two-locus model ( $p = 0.0010$ ) involving rs12615793 and smoking, the cross-validation consistency of

this two- locus model was 10/ 10, and the testing accuracy was 60.11%. In the logistic regression stratified analysis for the significant models. We found that current smokers with rs12615793- GA or AA genotype have the highest IS risk, compared to never- smokers with rs12615793- GG genotype, OR (95% CI) = 2.72 (1.64–3.86), after covariates adjustment; current drinkers with rs11896604- CG or GG genotype have the highest IS risk, compared to never- drinkers with rs11896604- CC genotype, OR (95%CI) = 2.51 (1.70–3.40), after covariates adjustment. (Table 4)

## DISCUSSION

In this study, we found that both the G allele of rs11896604 and the A allele of rs12615793 were significantly related with increased IS risk. However, rs843711 and rs11125529 were not associated with IS risk after covariates adjustment. To date, just one study [13] have reported the association between SNPs within *ACYP2* gene and IS risk. The authors suggested a significant association of *ACYP2* and *TSPYL6* polymorphisms with IS risk. However, the sample size of this study was relatively small, to validate the relationship between *ACYP2* and *TSPYL6* SNPs and IS susceptibility. Codd et al. [10] successfully confirmed that *ACYP2* gene was associated with TL, they identified the association of rs11125529 in *ACYP2* genes was associated with shorter TL in the European population. Previously, several studies have reported the association between *ACYP2* gene and some other diseases, such as lung cancer [14], colorectal cancer (CRC) [15], high altitude pulmonary edema (HAPE) [16] and coronary heart disease (CHD) [17]. Chen et al. [14] identified that several SNPs within *ACYP2*, including rs1682111, rs11896604 and rs843720, were associated with lung cancer in the Chinese Han population, they suggested *ACYP2* may be a useful marker that informs clinical decisions, and may shed light on new candidate genes and new ideas about the mechanism governing the occurrence of lung cancer. Liu et al. [15] indicate that SNPs in the *ACYP2* gene are associated with CRC in a Chinese Han population, and these SNPs may serve as a prognostic biomarkers for CRC in the Chinese population. Ding et al. [16] found that rs11125529 was associated with an age-related disease- CHD. A GWAS study conducted by Aouizerat et al. [11] indicated that *ACYP2*- rs1559040 was associated with sudden cardiac arrest in CAD patients. Besides, another two studies [17, 18] suggested a significant association between rs1872328 of *ACYP2* gene and susceptibility to cisplatin-induced hearing loss.

IS susceptibility was influenced by both genetic and environment factors, and previously several environmental factors associated with IS were reported, and in these risk factors, cigarette smoking and alcohol drinking have been suggested to play a crucial role in increasing the risk of IS risk. In current study, the rate of smoking and alcohol drinking were higher in

**Table 1: General characteristics of 1202 study participants in case and control group**

| Variables                  | Case group<br>(n = 600) | Control group<br>(n = 602) | p-values |
|----------------------------|-------------------------|----------------------------|----------|
| Age (year)                 | 67.8 ± 15.5             | 68.5 ± 16.2                | 0.444    |
| Males, N (%)               | 328 (54.7)              | 332 (55.5)                 | 0.866    |
| Smoking, N (%)             | 203 (33.8)              | 161 (26.7)                 | 0.007    |
| Alcohol consumption, N (%) | 287 (47.8)              | 206 (34.2)                 | < 0.001  |
| BMI (kg/m <sup>2</sup> )   | 24.8 ± 9.1              | 23.3 ± 9.0                 | 0.004    |
| Hypertension (%)           | 218 (36.3)              | 206 (34.2)                 | 0.443    |
| T2DM (%)                   | 120 (20.0)              | 130 (21.6)                 | 0.496    |

Note: Means ± standard deviation for age, WC, BMI; WC, waist circumference; BMI, body mass index.

**Table 2: Genotype and allele frequencies of 4 SNPs between case and control group**

| SNP           | Genotypes and Alleles | Frequencies N (%)    |                | OR (95%CI)*      | P-values | P-values for HWE test in controls |
|---------------|-----------------------|----------------------|----------------|------------------|----------|-----------------------------------|
|               |                       | Control<br>(n = 602) | Case (n = 600) |                  |          |                                   |
| rs843711      | Co-dominant           |                      |                |                  |          |                                   |
|               | CC                    | 352 (58.5)           | 313 (52.2)     | 1.00 (ref)       |          | 0.953                             |
|               | CT                    | 217 (36.0)           | 236 (39.3)     | 1.23 (0.80–1.81) | 0.486    |                                   |
|               | TT                    | 33 (5.5)             | 51 (8.5)       | 1.47 (0.75–2.27) | 0.521    |                                   |
|               | Dominant              |                      |                |                  |          |                                   |
|               | CC                    | 352 (58.5)           | 313 (52.2)     | 1.00 (ref)       |          | 0.516                             |
|               | CT+TT                 | 250 (41.5)           | 287 (47.8)     | 1.30 (0.78–1.90) | 0.516    |                                   |
| Allele, T (%) | 283 (23.5)            | 338 (28.2)           |                |                  |          |                                   |
| rs11896604    | Co-dominant           |                      |                |                  |          |                                   |
|               | CC                    | 388 (64.4)           | 297 (49.5)     | 1.00 (ref)       |          | 0.183                             |
|               | CG                    | 184 (30.6)           | 235 (39.2)     | 1.35 (1.12–1.79) | < 0.001  |                                   |
|               | GG                    | 30 (5.0)             | 68 (11.3)      | 2.10 (1.44–3.04) | < 0.001  |                                   |
|               | Dominant              |                      |                |                  |          |                                   |
|               | CC                    | 388 (64.4)           | 297 (49.5)     | 1.00 (ref)       |          | < 0.001                           |
|               | CG+GG                 | 214 (35.6)           | 303 (50.5)     | 1.60 (1.18–2.20) | < 0.001  |                                   |
| Allele, G (%) | 244 (20.3)            | 371 (30.9)           |                |                  |          |                                   |
| rs12615793    | Co-dominant           |                      |                |                  |          |                                   |
|               | GG                    | 394 (65.4)           | 308 (51.3)     | 1.00 (ref)       |          | 0.291                             |
|               | GA                    | 181 (30.1)           | 236 (39.3)     | 1.45 (1.20–1.83) | < 0.001  |                                   |
|               | AA                    | 27 (4.5)             | 56 (9.3)       | 2.10 (1.41–2.85) | < 0.001  |                                   |
|               | Dominant              |                      |                |                  |          |                                   |
|               | GG                    | 394 (65.4)           | 308 (51.3)     | 1.00 (ref)       |          | < 0.001                           |
|               | GA+AA                 | 208 (34.6)           | 292 (48.7)     | 1.66 (1.24–2.15) | < 0.001  |                                   |
| Allele, A (%) | 235 (19.5)            | 348 (29.0)           |                |                  |          |                                   |
| rs11125529    |                       |                      |                |                  |          |                                   |

|               |            |            |                  |       |       |
|---------------|------------|------------|------------------|-------|-------|
| Co-dominant   |            |            |                  |       |       |
| CC            | 345 (57.3) | 307 (51.2) | 1.00 (ref)       |       | 0.220 |
| CA            | 214 (35.6) | 231 (38.5) | 1.19 (0.79–1.74) | 0.607 |       |
| AA            | 43 (7.1)   | 62 (10.3)  | 1.41 (0.73–2.14) | 0.823 |       |
| Dominant      |            |            |                  |       |       |
| CC            | 345 (57.3) | 307 (51.2) | 1.00 (ref)       |       |       |
| CA+AA         | 257 (42.7) | 293 (48.8) | 1.24 (0.76–1.89) | 0.753 |       |
| Allele, A (%) | 300 (24.9) | 355 (29.6) |                  |       |       |

\*Adjusted for gender, age, smoking and alcohol status, BMI and WC. Bonferroni correction threshold:  $p < 0.00625$ .

**Table 3: GMDR analysis on the best gene–environment interaction models**

| Locus no.                            | Best combination                                           | Cross-validation consistency | Testing accuracy | <i>p</i> -values |
|--------------------------------------|------------------------------------------------------------|------------------------------|------------------|------------------|
| Gene- alcohol drinking interactions* |                                                            |                              |                  |                  |
| 2                                    | rs11896604 alcohol drinking                                | 10/10                        | 0.6072           | 0.0010           |
| 3                                    | rs11896604 rs11896604 alcohol drinking                     | 7/10                         | 0.5399           | 0.1719           |
| 4                                    | rs11896604 rs11896604 rs11125529 alcohol drinking          | 6/10                         | 0.5399           | 0.3770           |
| 5                                    | rs11896604 rs11896604 rs11125529 rs843711 alcohol drinking | 6/10                         | 0.4958           | 0.4258           |
| Gene- smoking interactions**         |                                                            |                              |                  |                  |
| 2                                    | rs12615793 Smoking                                         | 10/10                        | 0.6011           | 0.0010           |
| 3                                    | rs12615793 rs11896604 Smoking                              | 8/10                         | 0.5399           | 0.0547           |
| 4                                    | rs12615793 rs11896604 rs843711 Smoking                     | 7/10                         | 0.5399           | 0.1719           |
| 5                                    | rs12615793 rs11896604 rs843711 rs11125529 Smoking          | 6/10                         | 0.4958           | 0.4258           |

\*Adjusted for gender, age, smoking and BMI

\*\*Adjusted for gender, age, drinking and BMI.

IS cases than that in controls, so in this study we also investigated gene- smoking or drinking interaction on IS risk. We found a significant interaction involving rs12615793 and smoking, rs11896604 and alcohol drinking. Current smokers with rs12615793-GA+AA genotype have the highest IS risk, compared to never- smokers with rs12615793- GG genotype; current drinkers with rs11896604- CG+GG genotype have the highest IS risk, compared to never- drinkers with rs11896604-CC genotype. The results of this study suggest that the risk of IS may be modified by some lifestyle factors, such as smoking and alcohol drinking. These genetic variants

(rs12615793 and rs11896604) could influence susceptibility to IS risk, interact with smoking or alcohol drinking.

There several limitations in our study. Firstly, more SNPs within *ACYP2* gene should be included in the analysis, not only for just 4 SNPs. Secondly, some others environmental risk factors should be investigated in the gene-environment interaction analysis. Thirdly, haplotype analysis should be performed in the future studies.

In conclusion, we found that the G allele of rs11896604 and the A allele of rs12615793 within *ACYP2* gene, interaction between rs12615793 and smoking, rs11896604 and alcohol drinking were all associated with increased IS risk.

**Table 4: Stratified analysis for gene-environment interaction by using logistic regression**

| Variable 1 | Variable 2       | OR (95% CI)*     | P-values |
|------------|------------------|------------------|----------|
| rs11896604 | Alcohol drinking |                  |          |
| CC         | Never            | 1.00             | –        |
| CG+GG      | Never            | 1.31 (1.01–1.73) | 0.038    |
| CC         | Current          | 1.40 (1.10–1.82) | 0.002    |
| CG+GG      | Current          | 2.51 (1.70–3.40) | < 0.001  |
| rs12615793 | Smoking          |                  |          |
| GG         | Never            | 1.00             | –        |
| GA+AA      | Never            | 1.43 (1.04–1.87) | 0.022    |
| GG         | Current          | 1.56 (1.17–2.02) | < 0.001  |
| GA+AA      | Current          | 2.72 (1.64–3.86) | < 0.001  |

\*Adjusted for gender, age, drinking and BMI.

## MATERIALS AND METHODS

### Subjects

All study participants were recruited between Jun 2012 and March 2016 from Fujian Provincial Hospital. All patients were diagnosed with computed tomography (CT) and/or magnetic resonance imaging (MRI) scan confirming the presence of infarction. Patients were excluded from the study if stroke was determined to have resulted from trauma or any invasive hemorrhage. The controls were randomly selected from a population, who received physical examination in our hospital and 1:1 matched to cases on the basis of age ( $\pm 3$  years) and sex. Subjects with diabetes, hypertension and others related risks were not excluded from the controls. Both the IS cases and controls were unrelated Han Chinese population. All demographic and related clinical data including residential region, age, ethnicity, and education status were collected through a face-to-face questionnaire and a review of medical records. Body weight and height measured. Current cigarette smokers were those who self-reported smoking cigarettes at least once a day for 1 year or more. Current alcohol consumption was expressed as the sum of milliliters of alcohol per week from wine, beer, and spirits. Blood samples were collected from each participant in the morning after at least 8 hours of fasting. Informed consent was obtained from all participants.

### Genomic DNA extraction and genotyping

The SNPs were selected based on the NCBI database (<http://www.ncbi.nlm.nih.gov/projects/SNP>). Taking into account the limited human resources and financial resources, just 4 SNPs within *ACYP2* gene

were selected for genotyping, including: rs11896604, rs11896604, rs11125529 and rs843711. Genomic DNA from participants was extracted from EDTA-treated whole blood, using the DNA Blood Mini Kit (Qiagen, Hilden, Germany) according to the manufacturer's instructions. Genotyping was performed using a Sequenom MassARRAY RS1000 (Sequenom, Inc.) according to the manufacturer's protocol [19]. The SequenomTyper 4.0 Software™ (Sequenom, Inc.) was used to manage and analyze the data [20]. The nucleotide sequence of primers and description for the 6 SNPs were shown in Table 5.

### Statistical analysis

All statistical analyses were performed using the SPSS 22.0 software package (SPSS Inc, Chicago) for Windows 7. Categorical variables were presented as absolute values and percentages, and continuous variables were expressed as means  $\pm$  standard deviation (SD). Student's *t* test was used to compare continuous variables, while Chi-square test was used to compare categorical variables between cases and controls. Hardy-Weinberg equilibrium (HWE) examination was used by SNPstats (<http://bioinfo.iconcologia.net/SNPstats>). Generalized multifactor dimensionality reduction (GMDR) model was used to analyze the gene- gene and gene- environment interaction, some parameters including cross-validation consistency, the testing balanced accuracy and the sign test were calculated, a sign test or a permutation test (providing empirical *p*-values) for prediction accuracy can be used to measure the significance of an identified model. Logistic regression was performed to investigate association between 4 SNPs within *ACYP2* gene and IS risk, and used for stratified analysis on significant interaction combination obtained from GMDR. All reported *p*-values were two-

**Table 5: Description and primer sequence for 4 SNPs used for PCR analysis**

| SNP ID            | Chromosome | Functional Consequence | Major/minor alleles | Primer sequences                                                                                                         |
|-------------------|------------|------------------------|---------------------|--------------------------------------------------------------------------------------------------------------------------|
| rs843711          | 2:54251980 | Intron variant         | C/ T                | 1st-PCR: ACGTTGGATGGACAAAGGACCTTACAACCTC<br>2nd-PCR: ACGTTGGATGTGCCTTGTGGGA ATTAGAGC<br>UEP_SEQ: gggaTCAGGGAACCAAGTGCAAA |
| <b>rs11896604</b> | 2:54251980 | Intron variant         | C/ G                | 1st-PCR: ACGTTGGATGAAGTCAGAATAGTGCTTAC<br>2nd-PCR: ACGTTGGATGTGTCTCTGACCTAGCATGTA<br>UEP_SEQ: GTTAAGCTTGCAAGGAG          |
| <b>rs12615793</b> | 2:54248777 | Intron variant         | G/ A                | 1st-PCR: ACGTTGGATGTTTGAGCTTAGTTGTTTAC<br>2nd-PCR: ACGTTGGATGATCTTGCCCTTGAAGAA<br>UEP_SEQ: AAATTGAGTGACAAATATAAACTAC     |
| rs1125529         | 2:54248729 | Intron variant         | C/ A                | 1st-PCR: ACGTTGGATGGAGCTTAGTTGTTTACAGATG<br>2nd-PCR: ACGTTGGATGCCGAAGAAAAGAAGATGAC<br>UEP_SEQ: AGAAAAGAAGATGACTAAAACAT   |

tailed, and to correct for multiple testing we defined a Bonferroni corrected- threshold in different tables.

## ACKNOWLEDGMENTS

We thank the investigators and staffs from the Fujian Provincial Hospital, the Second Peoples Hospital Affiliated to Fujian University of Traditional Chinese Medicine, GanZhou Municipal hospital and Fuzhou Second Hospital. Qiong Cheng and Yong-kun Li contributed equally to this study. This work was supported in part by Key Projects of the Fujian Provincial Department of Science and Technology (No.2014Y0011 and wzkf201305).

## CONFLICTS OF INTEREST

There is no conflicts of interest.

## REFERENCES

1. Wardlaw JM, Murray V, Berge E, del Zoppo GJ. Thrombolysis for acute ischaemic stroke. *Cochrane Database Syst Rev.* 2014; 7:CD000213.
2. Sordo L, Indave BI, Barrio G, Degenhardt L, de la Fuente L, Bravo MJ. Cocaine use and risk of stroke: a systematic review. *Drug Alcohol Depend.* 2014; 142:1–13.
3. Wu Z, Yao C, Zhao D, Wu G, Wang W, Liu J, Zeng Z, Wu Y. Sino-MONICA project: a collaborative study on trends and determinants in cardiovascular diseases in China, Part i: morbidity and mortality monitoring. *Circulation.* 2001; 103:462–68.
4. Zhou M, Wang H, Zhu J, Chen W, Wang L, Liu S, Li Y, Wang L, Liu Y, Yin P, Liu J, Yu S, Tan F, et al. Cause-specific mortality for 240 causes in China during 1990–2013: a

systematic subnational analysis for the Global Burden of Disease Study 2013. *Lancet.* 2016; 387:251–72.

5. Jiang B, Wang WZ, Chen H, Hong Z, Yang QD, Wu SP, Du XL, Bao QJ. Incidence and trends of stroke and its subtypes in China: results from three large cities. *Stroke.* 2006; 37:63–68.
6. Richard Green A, Odergren T, Ashwood T. Animal models of stroke: do they have value for discovering neuroprotective agents? *Trends Pharmacol Sci.* 2003; 24:402–08.
7. Ding H, Chen C, Shaffer JR, Liu L, Xu Y, Wang X, Hui R, Wang DW. Telomere length and risk of stroke in Chinese. *Stroke.* 2012; 43:658–63.
8. Zee RY, Castonguay AJ, Barton NS, Ridker PM. Relative leukocyte telomere length and risk of incident ischemic stroke in men: a prospective, nested case-control approach. *Rejuvenation Res.* 2010; 13:411–14.
9. Degl'Innocenti D, Marzocchini R, Rosati F, Cellini E, Raugei G, Ramponi G. Acylphosphatase expression during macrophage differentiation and activation of U-937 cell line. *Biochimie.* 1999; 81:1031–35.
10. Codd V, Nelson CP, Albrecht E, Mangino M, Deelen J, Buxton JL, Hottenga JJ, Fischer K, Esko T, Surakka I, Broer L, Nyholt DR, Mateo Leach I, et al, and CARDIoGRAM consortium. Identification of seven loci affecting mean telomere length and their association with disease. *Nat Genet.* 2013; 45:422–27, e1–2.
11. Aouizerat BE, Vittinghoff E, Musone SL, Pawlikowska L, Kwok PY, Olgin JE, Tseng ZH. GWAS for discovery and replication of genetic loci associated with sudden cardiac arrest in patients with coronary artery disease. *BMC Cardiovasc Disord.* 2011; 11:29.
12. Kaul S, Munshi A. Genetics of ischemic stroke: indian perspective. *Neurol India.* 2012; 60:498–503.

13. Liang Y, Zhang R, Zhang S, Ji G, Shi P, Yang T, Liu F, Feng J, Li C, Guo D, Chen M. Association of ACYP2 and TSPYL6 Genetic Polymorphisms with Risk of Ischemic Stroke in Han Chinese Population. *Mol Neurobiol.* 2017; 54: 5988–5995.
14. Chen N, Yang X, Guo W, You J, Wu Q, Zhang G, Li H, Geng D, Jin T, Fu J, Zhang Y. Association of polymorphisms in the telomere-related gene ACYP2 with lung cancer risk in the Chinese Han population. *Oncotarget.* 2016; 7:87473–78. <https://doi.org/10.18632/oncotarget.13870>.
15. He Y, Zhang X, Li X, Du J, He X, Zhang Z, Zhang Y, Kang L, Jin T, Yuan D. Telomere length-related gene ACYP2 polymorphism is associated with the risk of HAPE in Chinese Han population. *J Gene Med.* 2016; 18:244–49.
16. Ding H, Yan F, Zhou LL, Ji XH, Gu XN, Tang ZW, Chen RH. Association between previously identified loci affecting telomere length and coronary heart disease (CHD) in Han Chinese population. *Clin Interv Aging.* 2014; 9:857–61.
17. Xu H, Robinson GW, Huang J, Lim JY, Zhang H, Bass JK, Broniscer A, Chintagumpala M, Bartels U, Gururangan S, Hassall T, Fisher M, Cohn R, et al. Common variants in ACYP2 influence susceptibility to cisplatin-induced hearing loss. *Nat Genet.* 2015; 47:263–66.
18. Vos HI, Guchelaar HJ, Gelderblom H, de Bont ES, Kremer LC, Naber AM, Hakobjan MH, van der Graaf WT, Coenen MJ, te Loo DM. Replication of a genetic variant in ACYP2 associated with cisplatin-induced hearing loss in patients with osteosarcoma. *Pharmacogenet Genomics.* 2016; 26:243–47.
19. Gabriel S, Ziaugra L, Tabbaa D. SNP genotyping using the Sequenom MassARRAY iPLEX platform. *Current protocols in human genetics.* 2009; 60:2.12.1-2.12.16.
20. Thomas RK, Baker AC, Debiasi RM, Winckler W, Laframboise T, Lin WM, Wang M, Feng W, Zander T, MacConaill L, Lee JC, Nicoletti R, Hatton C, et al. High-throughput oncogene mutation profiling in human cancer. *Nat Genet.* 2007; 39:347–51.
